# Supplementary material for: Prevalence and Risk of Inappropriate Sexual Behavior of Patients Toward Physical Therapist Clinicians and Students in the United States
Source: Oxford University Press journal article supplement (doi:10.1093/ptj/pzx086), 2017-08-18
Supplement: ptj_97_11_1084_s1.docx [file ptj_97_11_1084_s1.docx]

**eAppendix 1.**

Survey Questionnaire on Inappropriate Patient Sexual Behavior

**Section 1**

Q1 Please indicate your professional status

- Physical Therapist
- Physical Therapist Assistant
- Physical Therapist Student
- Physical Therapist Assistant Student

Q2 Have you completed at least one full-time 8-week clinical internship?

- Yes
- No

*Q2b If “No” was selected, then thank you for your time. Further participation in this survey requires at least 8 weeks of patient-care experience. Thank you again for your interest.*

Q3 What is your highest earned degree in physical therapy? (Select only one)

- PTA Associate's degree
- Baccalaureate degree (BS PT)
- Master's degree (MPT or MSPT)
- Doctorate degree (DPT or tDPT)

Q4 Indicate the number of years you have provided direct patient care in your role as a PT or PTA

- 0-5 years
- 6-10 years
- 11-20 years
- 21-30 years
- Greater than 30 years

Q5 Which of the following best describes the type of facility or institution in which you currently do all or most of your work (your primary position)?

- Acute care hospital
- Subacute rehab hospital (inpatient)
- Health system or hospital-based outpatient facility or clinic
- Private outpatient office or group practice
- SNF/ECF/ICF
- Patient's home/home care
- School system (preschool/ primary/ secondary)
- Academic institution (post-secondary)
- Health and wellness facility
- Research center
- Industry
- Other (please specify) ____________________

Q6 Using a total of 35 or more hours per week (at your primary position) as the definition of ‘full-time’, which one of the following describes your employment status over the past 12 months?

- Full-time
- Part-time
- Retired
- Unemployed or not seeking work

Q7 Have you treated patients in the last 12-months?

- Yes
- No

*Q7b If No Is Selected, Participant is skipped To Q15*

Q8 Over the past 12 months would you say your patients have been:

- Mostly women
- Mostly men
- Equal numbers

Q9 Over the past 12 months how often did you treat in private treatment booths or rooms (vs. gym or open areas)?

- Never
- Rarely
- Often
- Most of the time

Q10 Over the past 12 months how often did you see patients alone in your clinic or practice (no staff present at all)?

- Never
- Rarely
- Often
- Most of the time

Q11 Over the past 12 months have you routinely performed internal exams (rectal or vaginal) upon your patients?

- Yes
- No

*Q11b If No Is Selected, Participant is skipped To Q14*

Q12 Over the past 12 months have you routinely had a chaperone present when performing an internal examination (rectal or vaginal) on clients of the same sex as yourself?

- Yes
- No
- Not Applicable; I don't see patients that are the same sex as myself

Q13 Over the past 12 months have you routinely had a chaperone present when performing an internal examination (rectal or vaginal) on clients of a different sex from yourself?

- Yes
- No
- Not Applicable; I don't see patients that are a different sex from myself

Q14 Over the past 12 months have you routinely worked with patients with cognitive impairment such as Acquired Brain Injury (ABI), dementia or delirium, affecting judgment, impulse control or memory function?

- Yes
- No

Q15 Inappropriate patient sexual behavior (IPSB) is any "verbal or physical act of an explicit, or perceived, sexual nature, which is unacceptable within the social context in which it is carried out" when committed by a patient and directed at a clinician, staff or other patients in a healthcare setting. Have you had training in 'Inappropriate Patient Sexual Behavior'?

- Yes
- No

*Q15b If No Is Selected, Participant is skiped To Q17*

Q16 Please indicate where you received your training. Check all that are appropriate.

- In-service training
- Entry-level PT education
- Continuing education seminar
- Home study or on-line module
- Other, Describe: ____________________

Q17 Please indicate your gender:

- Male
- Female
- Trans*
- Other

Q18 Please indicate your age

- Under 30
- 30-40
- 41-50
- 51-60
- 61 or older

**Section 2**

*Note: The online version of this survey displays only the ‘career’ questions to those respondents who answered, “No” to Q7, “Have you treated patients in the last 12-months?”*

Q19 OVER THE COURSE OF YOUR CAREER, has a patient stared at you or your body parts in a way that made you uncomfortable?

- Yes
- No

Q20 OVER THE PAST 12 MONTHS, has a patient stared at you or your body parts in a way that made you uncomfortable?

- Yes
- No

Q21 OVER THE COURSE OF YOUR CAREER, has a patient made a sexually flattering or suggestive remark about your body or appearance that made you uncomfortable?

- Yes
- No

Q22 OVER THE PAST 12 MONTHS, has a patient made a sexually flattering or suggestive remark about your body or appearance that made you uncomfortable?

- Yes
- No

Q23 OVER THE COURSE OF YOUR CAREER, has a patient asked you for a date?

- Yes
- No

Q24 OVER THE PAST 12 MONTHS, has a patient asked you for a date?

- Yes
- No

Q25 OVER THE COURSE OF YOUR CAREER, has a patient given you a romantic or sexual gift?

- Yes
- No

Q26 OVER THE PAST 12 MONTHS, has a patient given you a romantic or sexual gift?

- Yes
- No

Q27 OVER THE COURSE OF YOUR CAREER, has a patient made an overtly sexual remark or joke, asked you questions about or commented on your sex life, or shared a sexual fantasy about you?

- Yes
- No

Q28 OVER THE PAST 12 MONTHS, has a patient made an overtly sexual remark or joke, asked you questions about or commented on your sex life, or shared a sexual fantasy about you?

- Yes
- No

Q29 OVER THE COURSE OF YOUR CAREER, has a patient propositioned you for sexual activity?

- Yes
- No

Q30 OVER THE PAST 12 MONTHS, has a patient propositioned you for sexual activity?

- Yes
- No

Q31 OVER THE COURSE OF YOUR CAREER, has a patient made sexually suggestive gestures?

- Yes
- No

Q32 OVER THE PAST 12 MONTHS, has a patient made sexually suggestive gestures?

- Yes
- No

Q33 OVER THE COURSE OF YOUR CAREER, has a patient deliberately exposed their genitals or breasts to you?

- Yes
- No

Q34 OVER THE PAST 12 MONTHS, has a patient deliberately exposed their genitals or breasts to you?

- Yes
- No

Q35 OVER THE COURSE OF YOUR CAREER, has a patient masturbated during a PT session?

- Yes
- No

Q36 OVER THE PAST 12 MONTHS, has a patient masturbated during a PT session?

- Yes
- No

Q37 OVER THE COURSE OF YOUR CAREER, has a patient purposefully touched or grabbed you in a private body area (thighs, genitals, breasts, buttocks) and/or in a clearly sexual manner?

- Yes
- No

Q38 OVER THE PAST 12 MONTHS, has a patient purposefully touched or grabbed you in a private body area (thighs, genitals, breasts, buttocks) and/or in a clearly sexual manner?

- Yes
- No

Q39 OVER THE COURSE OF YOUR CAREER, has a patient repeatedly followed, watched or harassed you inside or outside the workplace?

- Yes
- No

Q40 OVER THE PAST 12 MONTHS, has a patient repeatedly followed, watched or harassed you inside or outside the workplace?

- Yes
- No

Q41 OVER THE COURSE OF YOUR CAREER, has a patient threatened to force you or attempted to force you to submit to sexual activity?

- Yes
- No

Q42 OVER THE PAST 12 MONTHS, has a patient threatened to force you for attempted to force you to submit to sexual activity?

- Yes
- No

Q43 OVER THE COURSE OF YOUR CAREER, has a patient forced or coerced you to submit to sexual activity?

- Yes
- No

Q44 OVER THE PAST 12 MONTHS, has a patient forced or coerced you to submit to sexual activity?

- Yes
- No

*Note: For Q45-47, the online version of this survey skips respondents who answered “No” to Q7, (“Have you treated patients in the last 12-months?”) to Q48*

Q45 What was the gender of the patients involved in the IPSB that you experienced IN THE PAST 12 MONTHS?

- Majority male
- Nearly equal parts male and female
- Majority female

Q46 Did the IPSB you experienced occur with patients with cognitive impairment, such as Acquired Brain Injury (ABI), dementia or delirium, affecting judgement, impulse control or memory function OVER THE PAST 12 MONTHS?

- Yes, for most events
- Yes, for some events
- No

Q47 Were you working internally, around the perineum, or in other sensitive areas such as breast or groin, at the time of the IPSB you experienced OVER THE PAST 12 MONTHS?

- Yes, for most events
- Yes, for some events
- No

*Note: The online version of this survey skips respondents who answered “No” to Q47, to Q49*

Q48 Please take a moment to describe your patients' sexually inappropriate behavior(s) that occurred when you were working in private or sensitive areas of the body. We are interested in as many stories and any details you are willing to share.

*Note: For Q 49a and Q49, the online version of this survey skips respondents who answered “No” to Q7, (“Have you treated patients in the last 12-months?”) to Q77.*

*Note: For Q49-76, the online version of this survey skips a respondent who answers ‘No’ to utilizing a strategy, to the next question asking about utilization of a different strategy, rather than to a follow-up question on the impact of that first strategy (for example, in Q49, if the respondent selects, ‘No’ to using distraction or redirection, the respondent is then skipped to Q51)*

Q49a We know that these situations can be awkward, stressful or frightening and that in the moment professionals respond in many ways. We'd like to know how you have responded to the IPSB that OCCURRED IN THE LAST 12 MONTHS. Please answer honestly, even if you wish you had responded differently. Please select yes to any response you made in the last year, whether it was only once or repeatedly.

Q49 For IPSB that OCCURRED IN THE LAST 12 MONTHS did you distract or redirect the patient with alternate activity?

- Yes
- No

*If “no” was selected, participant is skipped to Q51.*

Q50 For IPSB that OCCURRED IN THE LAST 12 MONTHS how did distracting or redirecting the patient affect the situation? If you have done this more than once in the past 12 months, please report the overall effect or the effect the majority of the time.

- It made the situation better
- It did not affect the situation
- It made the situation worse
- I don't know or am unsure

Q51 For IPSB that OCCURRED IN THE LAST 12 MONTHS did you ignore the behavior or pretend it did not happen?

- Yes
- No

Q52 For IPSB that OCCURRED IN THE LAST 12 MONTHS how did ignoring the behavior affect the situation? If you have done this more than once in the past 12 months, please report the overall effect or the effect the majority of the time.

- It made the situation better
- It did not affect the situation
- It made the situation worse
- I don't know or am unsure

Q53 For IPSB that OCCURRED IN THE LAST 12 MONTHS did you treat in a more public space or select a different treatment method with less physical contact?

- Yes
- No

Q54 For IPSB that OCCURRED IN THE LAST 12 MONTHS how did changing space or treatment method affect the situation? If you have done this more than once in the past 12 months, please report the overall effect or the effect the majority of the time.

- It made the situation better
- It did not affect the situation
- It made the situation worse
- I don't know or am unsure

Q55 for IPSB that OCCURRED IN THE LAST 12 MONTHS did you laugh or joke about the behavior?

- Yes
- No

Q56 For IPSB that OCCURRED IN THE LAST 12 MONTHS how did laughing or joking affect the situation? If you have done this more than once in the past 12 months, please report the overall effect or the effect the majority of the time.

- It made the situation better
- It did not affect the situation
- It made the situation worse
- I don't know or am unsure

Q57 For IPSB that OCCURRED IN THE LAST 12 MONTHS did you speak directly to the patient about their behavior?

- Yes
- No

Q58 For IPSB that OCCURRED IN THE LAST 12 MONTHS how did speaking to the patient affect the situation? If you have done this more than once in the past 12 months, please report the overall effect or the effect the majority of the time.

- It made the situation better
- It did not affect the situation
- It made the situation worse
- I don't know or am unsure

Q59 For IPSB that OCCURRED IN THE LAST 12 MONTHS did you express disgust, criticize the patient, raise your voice, or verbally threaten the patient?

- Yes
- No

Q60 For IPSB that OCCURRED IN THE LAST 12 MONTHS how did responding with disgust, criticism, threats or volume affect the situation? If you have done this more than once in the past 12 months, please report the overall effect or the effect the majority of the time.

- It made the situation better
- It did not affect the situation
- It made the situation worse
- I don't know or am unsure

Q61 For IPSB that OCCURRED IN THE LAST 12 MONTHS did you use a behavioral contract or behavioral modification plan?

- Yes
- No

Q62 For IPSB that OCCURRED IN THE LAST 12 MONTHS how did the behavior plan or contract affect the situation? If you have done this more than once in the past 12 months, please report the overall effect or the effect the majority of the time.

- It made the situation better
- It did not affect the situation
- It made the situation worse
- I don't know or am unsure

Q63 For IPSB that OCCURRED IN THE LAST 12 MONTHS did you document patient behavior in the patient's chart?

- Yes
- No

Q64 For IPSB that OCCURRED IN THE LAST 12 MONTHS how did documenting the behavior affect the situation? If you have done this more than once in the past 12 months, please report the overall effect or the effect the majority of the time.

- It made the situation better
- It did not affect the situation
- It made the situation worse
- I don't know or am unsure

Q65 For IPSB that OCCURRED IN THE LAST 12 MONTHS did you use a chaperone on subsequent visits with this patient?

- Yes
- No

Q66 For IPSB that OCCURRED IN THE LAST 12 MONTHS how did using a chaperone affect the situation? If you have done this more than once in the past 12 months, please report the overall effect or the effect the majority of the time.

- It made the situation better
- It did not affect the situation
- It made the situation worse
- I don't know or am unsure

Q67 For IPSB that OCCURRED IN THE LAST 12 MONTHS did you transfer care to another provider?

- Yes
- No

Q68 For IPSB that OCCURRED IN THE LAST 12 MONTHS how did transferring care affect the situation? If you have done this more than once in the past 12 months, please report the overall effect or the effect the majority of the time.

- It made the situation better
- It did not affect the situation
- It made the situation worse
- I don't know or am unsure

Q69 After experiencing the IPSB in the past 12 months, did you terminate care and discharge the patient?

- Yes
- No

Q70 For IPSB that OCCURRED IN THE LAST 12 MONTHS how did terminating care affect the situation? If you have done this more than once in the past 12 months, please report the overall effect or the effect the majority of the time.

- It made the situation better
- It did not affect the situation
- It made the situation worse
- I don't know or am unsure

Q71 For IPSB that OCCURRED IN THE LAST 12 MONTHS did you report the behavior within the facility?

- Yes
- No

Q72 For IPSB that OCCURRED IN THE LAST 12 MONTHS how did reporting affect the situation? If you have done this more than once in the past 12 months, please report the overall effect or the effect the majority of the time.

- It made the situation better
- It did not affect the situation
- It made the situation worse
- I don't know or am unsure

Q73 For IPSB that OCCURRED IN THE LAST 12 MONTHS did you file a sexual harassment claim or lawsuit?

- Yes
- No

Q74 For IPSB that OCCURRED IN THE LAST 12 MONTHS how did filing a claim or suit affect the situation? If you have done this more than once in the past 12 months, please report the overall effect or the effect the majority of the time.

- It made the situation better
- It did not affect the situation
- It made the situation worse
- I don't know or am unsure

Q75 For IPSB that OCCURRED IN THE LAST 12 MONTHS did you contact law enforcement?

- Yes
- No

Q76 For IPSB that OCCURRED IN THE LAST 12 MONTHS how did contacting law enforcement affect the situation? If you have done this more than once in the past 12 months, please report the overall effect or the effect the majority of the time.

- It made the situation better
- It did not affect the situation
- It made the situation worse
- I don't know or am unsure

Q77 If there is anything you wish to add about your experiences with inappropriate patient sexual behavior, please do so here.

Q78 Should you need assistance after taking this survey regarding your past experiences with inappropriate patient sexual behavior, consider contacting the National Sexual Assault Hotline: 1-800-656-HOPEhttps://www.rainn.org/get-help/national-sexual-assault-hotline

Q79 Thank you so very much for your time and your expertise!

**eAppendix 2.**

Calculating Predicted Probability of Event

The coefficients provided for each model in Table 3 can be used to calculate predicted probability of event for any physical therapist practitioner based on the variables in that model. The following examples are for any IPSB over the past 12 months; the first model presented in Table 3. Using the coefficient for the intercept (−2.228) from the model, we can calculate the probability for a male therapist who doesn’t work with PWCIs, sees mostly women, and has >10 years DPC using the following equation: e−2.228/(1+e−2.228)=0.097. All of the selected conditions were the reference conditions for each variable, therefore only the intercept coefficient was needed for calculation. A clinician fitting this description would have ~10% chance of having any IPSB event over the past 12 months. Changing the clinician’s sex to female (female coefficient=0.784) changes the calculation to the following: e−2.228+0.784/(1+e−2.228+0.784)=0.191. Holding all other conditions constant, a female practitioner has a predicted probability of 19.1% compared to 9.7% for a male practitioner. Finally, if a clinician matches all of the high-risk conditions from the model for any IPSB in the past 12 months (ie, the practitioner is a woman, works routinely with PWCIs, sees mostly a male clientele, and has 5 or less years of DPC), then the predicted probability of an event would be e−2.228+0.784+0.525+1.339+0.839/(1+e−2.228+0.784+0.525+1.339+0.839)=0.779. This practitioner would have a 77.9% likelihood of any IPSB in the past 12 months.

Discriminate Ability of each Model

As seen above, each model can be used to calculate a predicted probability of having an IPSB event. Using the predicted probabilities from a model, one can determine how well the model predicts whether someone had an IPSB event by using Youden’s method for finding the best value of predicted probability to maximize sensitivity and specificity. See the table below. Sensitivity is the percentage of true positives and specificity is the percentage of true negatives captured. The area under the curve is an estimate of the likelihood of a correct prediction, and pseudo-*R*2 is an estimate of the percent variance of the outcome explained by the model.

**Summary of Each Model’s Ability to Classify a Clinician as Having or Not Having an Event**

| Model | Predicted Probability of Best Cutoff for Discriminate Ability | Sensitivity | Specificity | AUC*a* (95% CI) | Pseudo-*R*2 |
| --- | --- | --- | --- | --- | --- |
| Past 12 mo |  |  |  |  |  |
| Any IPSB | 45.7% | 77.8% | 50.1% | 0.69 (0.65–0.72) | 0.110 |
| Mild IPSB | 43.2% | 71.5% | 63.5% | 0.73 (0.69–0.76) | 0.151 |
| Moderate IPSB | 21.7% | 72.5% | 51.2% | 0.65 (0.61–0.70) | 0.059 |
| Severe IPSB | 9.2% | 87.4% | 44.2% | 0.66 (0.62–0.70) | 0.038 |

*a*AUC=area under the curve
